# Supplementary material
Source: MDPI journal article supplement (https://www.mdpi.com/2073-4441/14/6/975)
Supplement: s1 [file s1]

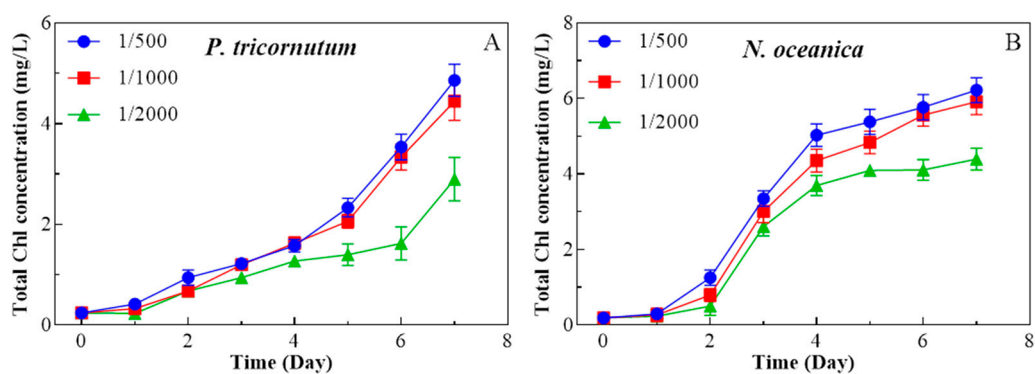

**Figure S1.** The changes in total chlorophyll of (A) *P. tricornutum* and (B) *N. oceanica*, cultured in seawater supplemented with different levels of MSGR. Values are expressed as means  $\pm$  s.d. (n = 3)

**Table S1.** The nutritional assimilation of the two microalgae, *P. tricornutum* and *N. oceanica*, grown in EM and in S-MSGR.

| Algae species         | Medium | Initial concentration |       | Assimilation   |        | Average yield      |       |
|-----------------------|--------|-----------------------|-------|----------------|--------|--------------------|-------|
|                       |        | (mg/L)                |       | efficiency (%) |        | coefficient (mg/g) |       |
|                       |        | TN                    | TP    | $AE_N$         | $AE_P$ | N-AYC              | P-AYC |
| <i>P. tricornutum</i> | EM     | 43.19                 | 2.092 | 50.7           | 98.9   | 32.9               | 3.11  |
|                       | S-MSGR | 179.4                 | 5.560 | 38.9           | 97.8   | 74.8               | 5.83  |
| <i>N. oceanica</i>    | EM     | 43.19                 | 2.092 | 25.0           | 97.5   | 22.4               | 10.5  |
|                       | S-MSGR | 179.4                 | 5.560 | 34.8           | 66.9   | 174.8              | 10.4  |

**Table S2. Comparison of the biomass and lipid production performances of *P. tricornutum* cultured in S-MSGR with other results reported in the literature.**

| Alga                  | Medium                                                                              | Conditions               | Biomass     |                         | Lipid       |                         | Ref.          |
|-----------------------|-------------------------------------------------------------------------------------|--------------------------|-------------|-------------------------|-------------|-------------------------|---------------|
|                       |                                                                                     |                          | Yield (g/L) | Productivity (mg/L/day) | Content (%) | Productivity (mg/L/day) |               |
| FACHB-863             | EM<br>S-MSGR                                                                        | T: 25 °C                 |             |                         |             |                         | This<br>paper |
|                       |                                                                                     | Illumination:            |             |                         |             |                         |               |
|                       |                                                                                     | 45 μmol/m²/s             | 0.66        | 55                      | 25.3        | 14.0                    |               |
|                       |                                                                                     | continuous illumination  | 0.93        | 77.5                    | 29.5        | 22.9                    |               |
| <i>P. tricornutum</i> | f/2 + NaNO <sub>3</sub><br>+ 0 mg/L<br>+ 16.45 mg/L<br>+ 32.09 mg/L<br>+ 64.29 mg/L | Time: 12 days            |             |                         |             |                         | [29]          |
|                       |                                                                                     | T: 20 °C                 |             |                         |             |                         |               |
|                       |                                                                                     | Illumination:            | 0.07        | 3.33                    | 53          | 1.77                    |               |
|                       |                                                                                     | 80–100 μmol/m²/s         | 0.17        | 8.10                    | 23          | 0.90                    |               |
|                       |                                                                                     | 14:10 (light:dark cycle) | 0.20        | 9.52                    | 9.6         | 1.86                    |               |
|                       |                                                                                     |                          | 0.23        | 10.95                   | 2.8         | 0.30                    |               |
|                       |                                                                                     | Time: 21 days            |             |                         |             |                         |               |
| UTEX 466              | f/2 + DMW (dairy<br>manure wastewater)<br>0%, 10%, 30%, 60%                         | T: 23 °C                 |             |                         |             |                         | [30]          |
|                       |                                                                                     | Illumination:            | 0.31        | 20.7                    | 15          | 3.1                     |               |
|                       |                                                                                     | 60–120 μmol/m²/s         | 0.20        | 13.3                    | 36          | 4.8                     |               |
|                       |                                                                                     | 16:8 (light:dark cycle)  | 0.57        | 38.0                    | 10          | 3.8                     |               |
|                       |                                                                                     |                          | 0.77        | 51.3                    | 3.4         | 1.7                     |               |
|                       |                                                                                     | Time: 15 days            |             |                         |             |                         |               |

|                       |                        |                               |           |        |          |       |      |
|-----------------------|------------------------|-------------------------------|-----------|--------|----------|-------|------|
| <i>P. tricornutum</i> | f/2                    | T: 20 °C                      |           |        |          |       |      |
|                       | +0, 0.5, 1, 2, 5 g/L   | Illumination:                 |           |        |          |       |      |
|                       | glucose                | 165 µmol/m <sup>2</sup> /s    | 0.66–1.16 | 66–116 | 18–50    | 18–50 | [31] |
|                       | Sodium acetate         | continuous                    | 0.6–0.89  | 60–89  | About 20 | 10–20 |      |
| PTN0301               | Starch                 | illumination                  |           |        |          |       |      |
|                       |                        | Time: 10 days                 |           |        |          |       |      |
|                       |                        | T: 20 °C                      |           |        |          |       |      |
|                       |                        | Illumination:                 |           |        |          |       |      |
| PTN0301               | Modified f/2           | 90–110 µmol/m <sup>2</sup> /s |           |        |          |       |      |
|                       | + waste products from  | 16:8 (light:dark              | 1.0       | 58.8   | 38       | 22.4  | [32] |
|                       | anaerobic digestion    | cycle)                        |           |        |          |       |      |
|                       | + CO <sub>2</sub> /air | Time: 17 days                 |           |        |          |       |      |
| CCMP632               |                        | Aeration:                     |           |        |          |       |      |
|                       |                        | 0.6 L CO <sub>2</sub> /L/day  |           |        |          |       |      |
|                       | f/2                    | T: 18 °C                      |           |        |          |       |      |
|                       | Municipal wastewater   | Illumination:                 | 0.31      | 31     | 20       | 5.3   |      |
|                       | (MW)                   | 120 µmol/m <sup>2</sup> /s    | 0.35      | 35     | 15       | 4.5   |      |
|                       | MW: seawater=1:2       | 12:12 (light:dark             | 0.40      | 40     | 15       | 5.5   | [33] |
|                       | MW: seawater=1:1       | cycle)                        | 0.42      | 42     | 15       | 5.5   |      |
|                       | MW: seawater=2:1       | Time: 10 days                 | 0.25      | 25     | 16       | 3.5   |      |

|                       |                               |                                 |       |      |      |      |      |
|-----------------------|-------------------------------|---------------------------------|-------|------|------|------|------|
|                       |                               | T: 25 °C                        |       |      |      |      |      |
| SAG1090-1             | f/2                           | Illumination:                   |       |      |      |      |      |
|                       | + ultrafiltered digestate     | 312 µmol/m <sup>2</sup> /s      | 3.11  | 183  | 27   | 49   |      |
|                       | (UF)                          | 12:12 (light:dark               | 3.25  | 191  | 27   | 51   | [34] |
|                       | + 0.02 mol/L glycerol (Gly)   | cycle)                          | 3.40  | 200  | 27   | 54   |      |
|                       |                               | Time: 17 days                   |       |      |      |      |      |
|                       |                               | Aeration: 10 L/min              |       |      |      |      |      |
|                       |                               | T: 30 °C                        |       |      |      |      |      |
| <i>P. tricornutum</i> | f/2                           | Illumination: –                 | 0.41  | 41   | 32   | 13.3 | [40] |
|                       |                               | Time: 10 days                   |       |      |      |      |      |
|                       |                               | Aeration: 1% CO <sub>2</sub>    |       |      |      |      |      |
|                       |                               | T: 22 °C                        |       |      |      |      |      |
| <i>P. tricornutum</i> | f/2+18 µmol/m <sup>2</sup> /s | Illumination:                   | 0.186 | 20.7 | 9.20 | 1.9  |      |
|                       | f/2+36 µmol/m <sup>2</sup> /s | 18/36/72 µmol/m <sup>2</sup> /s | 0.324 | 36.0 | 15.9 | 5.7  | [41] |
|                       | f/2+72 µmol/m <sup>2</sup> /s | 12:12 (light:dark               | 0.464 | 51.6 | 29.5 | 20   |      |
|                       |                               | cycle)                          |       |      |      |      |      |
|                       |                               | Time: 9 days                    |       |      |      |      |      |
|                       |                               | T: 18 °C                        |       |      |      |      |      |
|                       |                               | Illumination:                   |       |      |      |      |      |
| CCAP 1055/1           | Liquid medium (LM)            | 75 µmol/m <sup>2</sup> /s       | 1.0   | 100  | 28   | 28   |      |
|                       | LM + 1% glucose               | 16:8 (light:dark                | 1.0   | 100  | 28   | 28   | [42] |
|                       | LM + 1% glycine               | cycle)                          | 1.2   | 120  | 25   | 30   |      |
|                       |                               | Time: 10 days                   |       |      |      |      |      |
|                       |                               | Rotary shaker: 130 rpm          |       |      |      |      |      |

|                                         |                                                                              |                                                                                                                               |             |             |          |           |      |
|-----------------------------------------|------------------------------------------------------------------------------|-------------------------------------------------------------------------------------------------------------------------------|-------------|-------------|----------|-----------|------|
| FACHB-863                               | f/2-Si<br>f/2-Si + 2.5 mg/L 2,4-D<br>(2,4-<br>dichlorophenoxyacetic<br>acid) | T: 21 °C<br>Illumination:<br>150 µmol/m <sup>2</sup> /s<br>12:12 (light:dark<br>cycle)<br>Time: 8 days                        | 0.58<br>1.2 | 72.5<br>100 | 22<br>62 | 16<br>62  | [43] |
| SCSIO140,<br>771, 431, 433,<br>766, 828 | f/2 + 18.76 mg/L sodium<br>metasilicate                                      | T: 25 °C<br>Illumination:<br>40 µmol/m <sup>2</sup> /s<br>continuous<br>illumination<br>Time: 11 days                         | 0.25–0.36   | 22.7–32.7   | 16–31    | 6.81–7.16 | [44] |
| CCAP 1055/1                             | f/2 + Ammonium<br>f/2 + Ammonium with<br>tungstate                           | T: 25 °C<br>Illumination:<br>1000 µmol/m <sup>2</sup> /s<br>continuous<br>illumination<br>Time: 7 days                        | -           | -           | -        | 8–16      | [45] |
| Bohlin                                  | f/2                                                                          | T: 23 °C<br>Illumination:<br>200 µmol/m <sup>2</sup> /s<br>16:8 (light:dark<br>cycle)<br>Time: 14 days<br>Aeration: 120 L/min | 0.96        | 68.6        | 9.1      | 6.24      | [46] |

-: data are not mentioned.

**Table S3. Comparison of the biomass and lipid production performances of *N. oceanica* cultured in S-MSGR with other results from the literature.**

| Alga      | Medium        | Conditions                                                        | Biomass     |                         | Lipid       |                         | Ref.          |
|-----------|---------------|-------------------------------------------------------------------|-------------|-------------------------|-------------|-------------------------|---------------|
|           |               |                                                                   | Yield (g/L) | Productivity (mg/L/day) | Content (%) | Productivity (mg/L/day) |               |
| FACHB-926 | EM<br>S-MSGR  | T: 25 °C                                                          |             |                         |             |                         |               |
|           |               | Illumination:                                                     | 0.19        | 15.8                    | 27.5        | 4.5                     | This<br>paper |
|           |               | 45 $\mu\text{mol}/\text{m}^2/\text{s}$<br>continuous illumination | 0.36        | 30.0                    | 30.6        | 9.1                     |               |
| MK158312  | f/2           | Time: 12 days                                                     |             |                         |             |                         | [35]          |
|           |               | T: 25 °C                                                          |             |                         |             |                         |               |
|           |               | Illumination:                                                     | 0.36        | 30                      | 38          | 11.4                    |               |
| CCNM 1032 | Conway medium | 70 $\mu\text{mol}/\text{m}^2/\text{s}$                            |             |                         |             |                         | [36]          |
|           |               | 12:12 (light:dark cycle)                                          |             |                         |             |                         |               |
|           |               | Time: 12 days                                                     |             |                         |             |                         |               |
|           |               | T: 25 °C                                                          |             |                         |             |                         |               |
|           |               | Illumination:                                                     |             |                         |             |                         |               |
| CCNM 1032 | Conway medium | 60 and 150 $\mu\text{mol}/\text{m}^2/\text{s}$                    |             |                         |             |                         | [36]          |
|           |               | 12:12 (light:dark cycle)                                          |             |                         |             |                         |               |
|           |               | 40 $\mu\text{mol}/\text{m}^2/\text{s}$                            | 0.68–0.81   | 38–45                   | 13–33       | 5–15                    |               |
|           |               | different photoperiod<br>regimes                                  |             |                         |             |                         |               |
|           |               | Time:18 days                                                      |             |                         |             |                         |               |

|             |                                                                                                             |                                                                                                                                                                                                                                                                                                                                                  |         |           |           |                  |      |
|-------------|-------------------------------------------------------------------------------------------------------------|--------------------------------------------------------------------------------------------------------------------------------------------------------------------------------------------------------------------------------------------------------------------------------------------------------------------------------------------------|---------|-----------|-----------|------------------|------|
| CCMP 525    | f/2<br>+ 0, 150mg/L NaNO <sub>3</sub>                                                                       | T: 21 °C<br>Illumination:<br>50 µmol/m <sup>2</sup> /s<br>250 µmol/m <sup>2</sup> /s<br>continuous illumination<br>Time:12 days                                                                                                                                                                                                                  | 0.5–0.7 | 41.7–58.3 | 25.7–26.4 | 11–15            | [37] |
|             |                                                                                                             | T: 25 °C<br>Illumination:<br>170 µmol/m <sup>2</sup> /s<br>350 µmol/m <sup>2</sup> /s<br>700 µmol/m <sup>2</sup> /s<br>Time:7 days<br>Aeration: 2% CO <sub>2</sub><br>T: 25 °C<br>Illumination:<br>125.9 µmol/m <sup>2</sup> /s<br>continuous illumination<br>Time:7 days<br>Aeration: 30 mL/min<br>CO <sub>2</sub> :N <sub>2</sub> = 15:85, v/v |         |           |           |                  |      |
| CCALA 804   | mBG-11+170 µmol/m <sup>2</sup> /s<br>mBG-11+350 µmol/m <sup>2</sup> /s<br>mBG-11+700 µmol/m <sup>2</sup> /s | T: 25 °C<br>Illumination:<br>170 µmol/m <sup>2</sup> /s<br>350 µmol/m <sup>2</sup> /s<br>700 µmol/m <sup>2</sup> /s<br>Time:7 days<br>Aeration: 2% CO <sub>2</sub><br>T: 25 °C<br>Illumination:<br>125.9 µmol/m <sup>2</sup> /s<br>continuous illumination<br>Time:7 days<br>Aeration: 30 mL/min<br>CO <sub>2</sub> :N <sub>2</sub> = 15:85, v/v | 5       | -         | -         | 80<br>100<br>180 | [38] |
|             |                                                                                                             | T: 25 °C<br>Illumination:<br>125.9 µmol/m <sup>2</sup> /s<br>continuous illumination<br>Time:7 days<br>Aeration: 30 mL/min<br>CO <sub>2</sub> :N <sub>2</sub> = 15:85, v/v                                                                                                                                                                       |         |           |           |                  |      |
| CCMP1779    | f/2 + polyethylene glycol 200 (PEG 200)                                                                     | T: 25 °C<br>Illumination: 16:8<br>1000 µmol/m <sup>2</sup> /s<br>16:8 (light:dark cycle)<br>Time: 7 days                                                                                                                                                                                                                                         | 1.2–1.3 | 171–185   | 32.5–37.5 | 54.6–61.4        | [39] |
| CCAP 849/10 | f/2 +<br>Ammonium<br>Ammonium with tungstate                                                                | T: 25 °C<br>Illumination: 16:8<br>1000 µmol/m <sup>2</sup> /s<br>16:8 (light:dark cycle)<br>Time: 7 days                                                                                                                                                                                                                                         | -       | -         | -         | 14–16            | [45] |

|                    |                                                                                                 |                                                                                                                                                                              |                    |                     |                |                |      |
|--------------------|-------------------------------------------------------------------------------------------------|------------------------------------------------------------------------------------------------------------------------------------------------------------------------------|--------------------|---------------------|----------------|----------------|------|
| DUT01              | f/2 + 37.5, 75, 300<br>mg/L NaNO <sub>3</sub><br>BG11 + 37.5, 75, 300<br>mg/L NaNO <sub>3</sub> | T: 25 °C<br>Illumination:<br>60 µmol/m <sup>2</sup> /s<br>14:10 (light:dark cycle)<br>Time: 12 days<br>Aeration:<br>2% CO <sub>2</sub> , 0.2 m <sup>3</sup> /min<br>T: 25 °C | 0.2–0.6<br>0.7–1.3 | 16.7–50<br>58.3–108 | 10–30<br>10–30 | 10–15<br>18–30 | [47] |
|                    |                                                                                                 | Illumination:<br>85 µmol/m <sup>2</sup> /s<br>Time: 9 day<br>Aeration:<br>4 mL/min, 15% CO <sub>2</sub><br>T: 25 °C                                                          |                    |                     |                |                |      |
| CCMP1779           | F/2<br>+1.04g/day NaHCO <sub>3</sub>                                                            | Illumination:<br>85 µmol/m <sup>2</sup> /s<br>Time: 9 day<br>Aeration:<br>4 mL/min, 15% CO <sub>2</sub><br>T: 25 °C                                                          | 1–1.5              | -                   | -              | -              | [48] |
| <i>N. oceanica</i> | Conway medium<br>+ 0, 2.5, 5, 10, 15, 25,<br>30, 40 g/L glucose                                 | Illumination:<br>60 µmol/m <sup>2</sup> /s<br>12:12 (light:dark cycle)<br>Time: 15 days<br>T: 25 °C                                                                          | 0.6–1.0            | 40–67               | 25–40          | 12–24          | [49] |
| CCAP 849/10        | f/2 + 0.1, 1, 2.5, 5, 10<br>ppm IAA (3-<br>indoleacetic acid)                                   | Illumination:<br>100 µmol/m <sup>2</sup> /s<br>12:12 (light:dark cycle)<br>Time: 12 days                                                                                     | 0.12–0.38          | 10–31.9             | 10–30          | 1.5–5.5        | [50] |



|                    |                                                                                                                                                                            |                                                                                                                                                                                                        |         |           |       |        |      |
|--------------------|----------------------------------------------------------------------------------------------------------------------------------------------------------------------------|--------------------------------------------------------------------------------------------------------------------------------------------------------------------------------------------------------|---------|-----------|-------|--------|------|
| SCS-1981           | 0.5 g/L NaNO <sub>3</sub> ,<br>20 mg/L NaH <sub>2</sub> PO <sub>4</sub> ,<br>5.0 mg /L FeSO <sub>4</sub> ·7H <sub>2</sub> O,<br>1.0 g/L NaHCO <sub>3</sub><br>Salinity 28‰ | Open pond system                                                                                                                                                                                       | 0.55    |           | 15–20 | 5.68   | [51] |
| CCMP1779           | f/2<br>+0.5g/L NaHCO <sub>3</sub>                                                                                                                                          | T: 20 °C<br>Illumination:<br>100 µmol/m <sup>2</sup> /s<br>Time:12 day<br>Rotary shaker 120 rpm<br>T: 20 °C<br>Illumination:<br>100 µmol/m <sup>2</sup> /s                                             | 0.2     | -         | -     | -      | [52] |
| <i>N. oceanica</i> | f/2                                                                                                                                                                        | 12:12 (light:dark cycle)<br>different LED colours<br>Time:13 days<br>Aeration: 2.5 L/min<br>T: 16 °C<br>Illumination:<br>200 µmol/m <sup>2</sup> /s<br>12:12 (light:dark cycle)<br>Aeration: 2.5 L/min | 0.4–0.6 | 30.8–46.2 | 24–45 | 7–20.7 | [53] |
| CCAP 849/10        | f/2<br>f/2 + 1.0 mg/L sodium<br>bicarbonate                                                                                                                                | 200 µmol/m <sup>2</sup> /s<br>12:12 (light:dark cycle)<br>Aeration: 2.5 L/min                                                                                                                          | -       | -         | 20    | 1.5    | [54] |

-: data are not mentioned.
